# Supplementary material for: Fluvalinate-Induced Changes in MicroRNA Expression Profile of Apis mellifera ligustica Brain Tissue
Source: Front Genet. 2022 Apr 12;13:855987. doi: 10.3389/fgene.2022.855987 (PMC9039055; doi:10.3389/fgene.2022.855987)
Supplement: Supplementary file 7 [file Table5.XLSX]

## Sheet: Sheet1
DEMs Cluster	KEGG_A_class	KEGG_B_class	Pathway	one.target (220)	All (5161)	Pvalue	Qvalue	Pathway ID	Genes	K_IDs
Cluster one	Organismal Systems	Development	Dorso-ventral axis formation	44	100	4.35758e-35	2.30952e-33	ko04320	XM_006558453.3(Br-c);XM_006558456.3(Br-c);XM_006558459.3(Br-c);XM_006558460.3(Br-c);XM_006558461.3(Br-c);XM_006558462.3(Br-c);XM_006558463.3(Br-c);XM_006558464.3(Br-c);XM_006558466.3(Br-c);XM_006562560.3(LOC408936);XM_006562561.3(LOC408936);XM_006562562.3(LOC408936);XM_006562563.3(LOC408936);XM_006562564.3(LOC408936);XM_006562565.3(LOC408936);XM_006562566.3(LOC408936);XM_392465.7(LOC408936);XM_02…	K02174+K02174+K02174+K02174+K02174+K02174+K02174+K02174+K02174+K03102+K03102+K03102+K03102+K03102+K03102+K03102+K03102+K02177+K02177+K02177+K02177+K02177+K02177+K02177+K02177+K02177+K02177+K02177+K02177+K02177+K02177+K02177+K02177+K02177+K02177+K02177+K02177+K02177+K02177+K02177+K02177+K02177+K02177+K02177
Cluster one	Genetic Information Processing	Transcription	Spliceosome	22	190	1.48312e-05	0.000393028	ko03040	XM_006566431.3(LOC408309);XM_006566432.3(LOC408309);XM_006566433.3(LOC408309);XM_006566434.3(LOC408309);XM_006566435.3(LOC408309);XM_006566436.3(LOC408309);XM_006566437.3(LOC408309);XM_006566440.3(LOC408309);XM_006566442.3(LOC408309);XM_006566444.3(LOC408309);XM_006566446.3(LOC408309);XM_006566447.3(LOC408309);XM_006566452.3(LOC408309);XM_016914774.2(LOC408309);XM_016914775.2(LOC408309);XM_016914…	K12893+K12893+K12893+K12893+K12893+K12893+K12893+K12893+K12893+K12893+K12893+K12893+K12893+K12893+K12893+K12893+K12893+K12893+K12893+K12893+K12893+K12893
Cluster one	Environmental Information Processing	Signal transduction	Wnt signaling pathway	25	253	5.95656e-05	0.00105233	ko04310	NM_001278335.1(ROCK2);XM_006571453.3(ROCK2);XM_003250942.4(LOC408791);XM_003250943.4(LOC408791);XM_006567225.3(LOC408791);XM_006567226.3(LOC408791);XM_016911760.2(LOC408791);XM_026440433.1(LOC408791);XM_006564380.3(LOC724501);XM_006564381.3(LOC724501);XM_016915227.2(LOC724501);XM_016915228.2(LOC724501);XM_016915229.2(LOC724501);XM_026443723.1(LOC724501);XM_006568834.3(LOC726280);XM_026439074.1(LO…	K17388+K17388+K05858+K05858+K05858+K05858+K05858+K05858+K02157+K02157+K02157+K02157+K02157+K02157+K04498+K04498+K04498+K04498+K04498+K04498+K04468+K04468+K04491+K04491+K04392
Cluster one	Metabolism	Metabolism of cofactors and vitamins	Retinol metabolism	6	24	0.000395263	0.00451078	ko00830	XM_006560311.3(LOC552377);XM_006560312.3(LOC552377);XM_016915824.2(LOC552377);XM_016915825.2(LOC552377);XM_016915826.2(LOC552377);XM_016915827.2(LOC552377)	K11155+K11155+K11155+K11155+K11155+K11155
Cluster one	Environmental Information Processing	Signal transduction	Hedgehog signaling pathway - fly	12	91	0.000425546	0.00451078	ko04341	XM_006557903.3(LOC100576449);XM_006557904.3(LOC100576449);XM_026440701.1(LOC100576449);XM_026440702.1(LOC100576449);XM_006569003.3(LOC410831);XM_006569004.3(LOC410831);XM_006569010.3(LOC410831);XM_006569011.3(LOC410831);XM_026439290.1(LOC410831);XM_026439291.1(LOC410831);XM_026439292.1(LOC410831);XM_026439293.1(LOC410831)	K06225+K06225+K06225+K06225+K08958+K08958+K08958+K08958+K08958+K08958+K08958+K08958
Cluster one	Environmental Information Processing	Signaling molecules and interaction	Neuroactive ligand-receptor interaction	12	117	0.00389221	0.0299932	ko04080	XM_026445257.1(DopR2);XM_026445258.1(DopR2);XM_026445259.1(DopR2);XM_006565095.3(LOC406124);XM_006565096.3(LOC406124);XM_006565098.3(LOC406124);XM_006565100.3(LOC406124);XM_006565101.3(LOC406124);XM_006565104.3(LOC406124);XM_006565107.3(LOC406124);XM_026441999.1(LOC406124);XM_006562370.3(LOC410654)	K04148+K04148+K04148+K05181+K05181+K05181+K05181+K05181+K05181+K05181+K05181+K04194
Cluster one	Environmental Information Processing	Signal transduction	FoxO signaling pathway	14	148	0.00396137	0.0299932	ko04068	XM_006568834.3(LOC726280);XM_026439074.1(LOC726280);XM_026439075.1(LOC726280);XM_026439076.1(LOC726280);XM_026439077.1(LOC726280);XM_026439078.1(LOC726280);XM_016911232.2(LOC410956);XM_394432.7(LOC410956);XM_026439029.1(LOC726051);XM_026439030.1(LOC726051);XM_026443028.1(LOC411297);XM_026443029.1(LOC411297);XM_026443030.1(LOC411297);XM_394771.7(LOC411297)	K04498+K04498+K04498+K04498+K04498+K04498+K04468+K04468+K08861+K08861+K04527+K04527+K04527+K04527
Cluster one	Genetic Information Processing	Replication and repair	Base excision repair	6	40	0.00637792	0.0422537	ko03410	XM_006570360.3(LOC413086);XM_016914884.2(LOC413086);XM_016914885.2(LOC413086);XM_016914886.2(LOC413086);XM_016914887.2(LOC413086);XM_396537.7(LOC413086)	K10776+K10776+K10776+K10776+K10776+K10776
Cluster two	Environmental Information Processing	Signal transduction	Wnt signaling pathway	95	253	3.42197e-35	3.04556e-33	ko04310	XM_006570268.3(Pkc);XM_016914657.2(Pkc);XM_006560509.3(Camkii);XM_006560512.3(Camkii);XM_006560514.3(Camkii);XM_006560519.3(Camkii);XM_006560524.3(Camkii);XM_006560525.3(Camkii);XM_006560526.3(Camkii);XM_006560527.3(Camkii);XM_006560528.3(Camkii);XM_006560529.3(Camkii);XM_006560530.3(Camkii);XM_006560531.3(Camkii);XM_006560532.3(Camkii);XM_006560533.3(Camkii);XM_006560534.3(Camkii);XM_006560535.3…	K02677+K02677+K04515+K04515+K04515+K04515+K04515+K04515+K04515+K04515+K04515+K04515+K04515+K04515+K04515+K04515+K04515+K04515+K04515+K04515+K04515+K04515+K04515+K04515+K04515+K04515+K04515+K04515+K04515+K04515+K04515+K04515+K04515+K04515+K04515+K04515+K04515+K04515+K04515+K04515+K04515+K04515+K04515+K04515+K03213+K04377+K04377+K04448+K02375+K02375+K02375+K02375+K02375+K04512+K04512+K04512+K04512+…
Cluster two	Organismal Systems	Sensory system	Phototransduction - fly	47	105	2.46604e-21	1.09739e-19	ko04745	XM_006570268.3(Pkc);XM_016914657.2(Pkc);XM_006560509.3(Camkii);XM_006560512.3(Camkii);XM_006560514.3(Camkii);XM_006560519.3(Camkii);XM_006560524.3(Camkii);XM_006560525.3(Camkii);XM_006560526.3(Camkii);XM_006560527.3(Camkii);XM_006560528.3(Camkii);XM_006560529.3(Camkii);XM_006560530.3(Camkii);XM_006560531.3(Camkii);XM_006560532.3(Camkii);XM_006560533.3(Camkii);XM_006560534.3(Camkii);XM_006560535.3…	K02677+K02677+K04515+K04515+K04515+K04515+K04515+K04515+K04515+K04515+K04515+K04515+K04515+K04515+K04515+K04515+K04515+K04515+K04515+K04515+K04515+K04515+K04515+K04515+K04515+K04515+K04515+K04515+K04515+K04515+K04515+K04515+K04515+K04515+K04515+K04515+K04515+K04515+K04515+K04515+K04515+K04515+K04515+K04515+K08834+K08834+K13803
Cluster two	Environmental Information Processing	Signal transduction	Hippo signaling pathway -fly	54	178	2.67146e-15	7.92534e-14	ko04391	XM_016914905.2(LOC100576392);XM_016914906.2(LOC100576392);XM_006558603.3(LOC413834);XM_016917618.2(LOC413834);XM_026446280.1(LOC413834);XM_397273.7(LOC413834);XM_006562523.3(LOC408616);XM_006562524.3(LOC408616);XM_006562525.3(LOC408616);XM_006562526.3(LOC408616);XM_006562527.3(LOC408616);XM_006562529.3(LOC408616);XM_016913819.2(LOC408616);XM_016913824.2(LOC408616);XM_016913826.2(LOC408616);XM_026…	K04377+K04377+K06069+K06069+K06069+K06069+K09448+K09448+K09448+K09448+K09448+K09448+K09448+K09448+K09448+K09448+K09448+K09448+K09448+K04354+K04354+K04354+K04354+K04354+K04354+K04354+K04354+K04354+K16677+K16677+K16677+K16677+K16677+K16677+K16677+K16677+K16677+K16677+K16677+K16677+K12076+K12076+K12076+K12076+K12076+K12076+K12076+K12076+K12076+K12076+K12076+K12076+K12076+K12076
Cluster two	Organismal Systems	Environmental adaptation	Circadian rhythm - fly	24	49	1.65655e-12	3.68583e-11	ko04711	XM_003250814.4(LOC410253);XM_006566486.3(LOC410253);XM_006567363.3(LOC408976);XM_016913901.2(LOC408976);XM_026443007.1(LOC408976);XM_026443008.1(LOC408976);XM_026443009.1(LOC408976);XM_026443010.1(LOC408976);XM_026443011.1(LOC408976);XM_026443012.1(LOC408976);XM_026443013.1(LOC408976);XM_026443014.1(LOC408976);XM_026443015.1(LOC408976);XM_026443016.1(LOC408976);XM_026443017.1(LOC408976);XM_026443…	K12114+K12114+K03083+K03083+K03083+K03083+K03083+K03083+K03083+K03083+K03083+K03083+K03083+K03083+K03083+K03083+K03083+K03083+K03083+K03083+K03083+K03083+K03083+K03083
Cluster two	Environmental Information Processing	Signal transduction	Hedgehog signaling pathway - fly	33	91	3.80564e-12	6.77405e-11	ko04341	XM_006557903.3(LOC100576449);XM_006557904.3(LOC100576449);XM_026440701.1(LOC100576449);XM_026440702.1(LOC100576449);XM_006558250.3(LOC411827);XM_394044.7(LOC410565);XM_006566747.3(LOC409942);XM_006566748.3(LOC409942);XM_006566749.3(LOC409942);XM_006567363.3(LOC408976);XM_016913901.2(LOC408976);XM_026443007.1(LOC408976);XM_026443008.1(LOC408976);XM_026443009.1(LOC408976);XM_026443010.1(LOC408976);…	K06225+K06225+K06225+K06225+K10523+K03347+K20245+K20245+K20245+K03083+K03083+K03083+K03083+K03083+K03083+K03083+K03083+K03083+K03083+K03083+K03083+K03083+K03083+K03083+K03083+K03083+K03083+K03083+K03083+K03083+K03083+K08957+K08291
Cluster two	Organismal Systems	Development	Dorso-ventral axis formation	33	100	7.34018e-11	1.08879e-09	ko04320	XM_006560840.3(LOC724704);XM_016912999.2(LOC724704);XM_006567988.3(LOC413289);XM_006568761.3(LOC725626);XM_016912014.2(LOC411907);XM_395376.6(LOC411907);XM_026439100.1(LOC409780);XM_026439104.1(LOC409780);XM_026439112.1(LOC409780);XM_026439114.1(LOC409780);XM_026439115.1(LOC409780);XM_026439119.1(LOC409780);XM_026439121.1(LOC409780);XM_026439125.1(LOC409780);XM_026439126.1(LOC409780);XM_026439128…	K02602+K02602+K02599+K03102+K02602+K02602+K02177+K02177+K02177+K02177+K02177+K02177+K02177+K02177+K02177+K02177+K02177+K02177+K02177+K02177+K02177+K02177+K02177+K02177+K02177+K02177+K02177+K02177+K02177+K02177+K02177+K02177+K02177
Cluster two	Metabolism	Glycan biosynthesis and metabolism	Glycosaminoglycan biosynthesis - heparan sulfate / heparin	12	27	2.62385e-06	3.33603e-05	ko00534	XM_006566003.3(LOC408293);XM_006569235.3(LOC412956);XM_006569236.3(LOC412956);XM_006569237.3(LOC412956);XM_006569238.3(LOC412956);XM_006569241.3(LOC412956);XM_016911310.2(LOC412956);XM_016911312.2(LOC412956);XM_016911313.2(LOC412956);XM_026439827.1(LOC412956);XM_396407.6(LOC412956);XM_396716.7(LOC413271)	K02366+K08104+K08104+K08104+K08104+K08104+K08104+K08104+K08104+K08104+K08104+K10158
Cluster two	Metabolism	Carbohydrate metabolism	Inositol phosphate metabolism	29	125	5.08939e-06	5.66194e-05	ko00562	NM_001097154.2(Tpi);XM_001120893.5(LOC724991);XM_006571069.3(LOC724991);XM_006571070.3(LOC724991);XM_006571071.3(LOC724991);XM_006571072.3(LOC724991);XM_006571073.3(LOC724991);XM_006571074.3(LOC724991);XM_006571075.3(LOC724991);XM_006571078.3(LOC724991);XM_006571079.3(LOC724991);XM_006571081.3(LOC724991);XM_006571082.3(LOC724991);XM_016915526.2(LOC724991);XM_006562403.3(LOC409136);XM_026443595.1(…	K01803+K00889+K00889+K00889+K00889+K00889+K00889+K00889+K00889+K00889+K00889+K00889+K00889+K00889+K20278+K20278+K00921+K05860+K05860+K05860+K05860+K05860+K05860+K01099+K01099+K01099+K01099+K01099+K19801
Cluster two	Environmental Information Processing	Signal transduction	mTOR signaling pathway	38	197	1.9806e-05	0.00019586	ko04150	XM_006570268.3(Pkc);XM_016914657.2(Pkc);XM_006559225.3(LOC100576247);XM_006559226.3(LOC100576247);XM_006559227.3(LOC100576247);XM_006559228.2(LOC100576247);XM_006559230.3(LOC100576247);XM_006559968.3(LOC725584);XM_006562747.3(LOC409050);XM_392577.7(LOC409050);XM_006565041.3(LOC408438);XM_006565042.3(LOC408438);XM_006565043.3(LOC408438);XM_006567363.3(LOC408976);XM_016913901.2(LOC408976);XM_026443…	K02677+K02677+K02375+K02375+K02375+K02375+K02375+K20396+K02353+K02353+K16172+K16172+K16172+K03083+K03083+K03083+K03083+K03083+K03083+K03083+K03083+K03083+K03083+K03083+K03083+K03083+K03083+K03083+K03083+K03083+K03083+K03083+K03083+K03083+K03083+K06276+K06276+K06276
Cluster two	Environmental Information Processing	Signal transduction	Phosphatidylinositol signaling system	32	159	3.80824e-05	0.000338933	ko04070	XM_006570268.3(Pkc);XM_016914657.2(Pkc);XM_001120893.5(LOC724991);XM_006571069.3(LOC724991);XM_006571070.3(LOC724991);XM_006571071.3(LOC724991);XM_006571072.3(LOC724991);XM_006571073.3(LOC724991);XM_006571074.3(LOC724991);XM_006571075.3(LOC724991);XM_006571078.3(LOC724991);XM_006571079.3(LOC724991);XM_006571081.3(LOC724991);XM_006571082.3(LOC724991);XM_016915526.2(LOC724991);XM_006557504.3(LOC413…	K02677+K02677+K00889+K00889+K00889+K00889+K00889+K00889+K00889+K00889+K00889+K00889+K00889+K00889+K00889+K00901+K00901+K20278+K20278+K00921+K05860+K05860+K05860+K05860+K05860+K05860+K01099+K01099+K01099+K01099+K01099+K19801
Cluster two	Cellular Processes	Transport and catabolism	Endocytosis	47	292	0.000250979	0.00203065	ko04144	XM_001120025.5(LOC724873);XM_001120355.5(LOC725678);XM_001120893.5(LOC724991);XM_006571069.3(LOC724991);XM_006571070.3(LOC724991);XM_006571071.3(LOC724991);XM_006571072.3(LOC724991);XM_006571073.3(LOC724991);XM_006571074.3(LOC724991);XM_006571075.3(LOC724991);XM_006571078.3(LOC724991);XM_006571079.3(LOC724991);XM_006571081.3(LOC724991);XM_006571082.3(LOC724991);XM_016915526.2(LOC724991);XM_006558…	K07897+K05756+K00889+K00889+K00889+K00889+K00889+K00889+K00889+K00889+K00889+K00889+K00889+K00889+K00889+K06069+K06069+K06069+K06069+K12475+K12475+K12475+K12475+K04439+K04439+K04439+K04439+K04439+K12489+K12489+K01528+K01528+K01528+K01528+K01528+K01528+K01528+K01528+K01528+K01528+K01528+K18467+K07901+K07901+K08291+K11824+K18466
Cluster two	Metabolism	Glycan biosynthesis and metabolism	Glycosaminoglycan biosynthesis - chondroitin sulfate / dermatan sulfate	6	12	0.000440731	0.00326875	ko00532	XM_006560420.2(LOC413549);XM_006560421.3(LOC413549);XM_396991.7(LOC413549);XM_006562830.3(LOC550998);XM_006562831.3(LOC550998);XM_396716.7(LOC413271)	K13499+K13499+K13499+K01017+K01017+K10158
Cluster two	Environmental Information Processing	Signal transduction	Hippo signaling pathway - multiple species	13	50	0.000683203	0.00467731	ko04392	XM_006562523.3(LOC408616);XM_006562524.3(LOC408616);XM_006562525.3(LOC408616);XM_006562526.3(LOC408616);XM_006562527.3(LOC408616);XM_006562529.3(LOC408616);XM_016913819.2(LOC408616);XM_016913824.2(LOC408616);XM_016913826.2(LOC408616);XM_026446053.1(LOC408616);XM_026446054.1(LOC408616);XM_026446055.1(LOC408616);XM_392157.6(LOC408616)	K09448+K09448+K09448+K09448+K09448+K09448+K09448+K09448+K09448+K09448+K09448+K09448+K09448
Cluster two	Metabolism	Metabolism of cofactors and vitamins	Retinol metabolism	7	24	0.0060779	0.0386381	ko00830	XM_006560311.3(LOC552377);XM_006560312.3(LOC552377);XM_016915824.2(LOC552377);XM_016915825.2(LOC552377);XM_016915826.2(LOC552377);XM_016915827.2(LOC552377);XM_392781.7(LOC409260)	K11155+K11155+K11155+K11155+K11155+K11155+K15734
Cluster two	Environmental Information Processing	Signal transduction	Notch signaling pathway	13	64	0.00719589	0.0426956	ko04330	XM_006562747.3(LOC409050);XM_392577.7(LOC409050);XM_006564180.3(LOC413169);XM_006566412.3(LOC410351);XM_016915193.2(LOC410351);XM_006567988.3(LOC413289);XM_026443993.1(LOC727399);XM_026443995.1(LOC727399);XM_026443997.1(LOC727399);XM_026443999.1(LOC727399);XM_026444000.1(LOC727399);XM_026444001.1(LOC727399);XM_394976.7(LOC411503)	K02353+K02353+K04505+K06051+K06051+K02599+K06057+K06057+K06057+K06057+K06057+K06057+K06067
Cluster three	Organismal Systems	Sensory system	Phototransduction - fly	57	105	5.56542e-22	5.84369e-20	ko04745	XM_006560509.3(Camkii);XM_006560512.3(Camkii);XM_006560514.3(Camkii);XM_006560519.3(Camkii);XM_006560524.3(Camkii);XM_006560525.3(Camkii);XM_006560526.3(Camkii);XM_006560527.3(Camkii);XM_006560528.3(Camkii);XM_006560529.3(Camkii);XM_006560530.3(Camkii);XM_006560531.3(Camkii);XM_006560532.3(Camkii);XM_006560533.3(Camkii);XM_006560534.3(Camkii);XM_006560535.3(Camkii);XM_006560536.3(Camkii);XM_00656…	K04515+K04515+K04515+K04515+K04515+K04515+K04515+K04515+K04515+K04515+K04515+K04515+K04515+K04515+K04515+K04515+K04515+K04515+K04515+K04515+K04515+K04515+K04515+K04515+K04515+K04515+K04515+K04515+K04515+K04515+K04515+K04515+K04515+K04515+K04515+K04515+K04515+K04515+K04515+K04515+K04515+K04515+K04967+K04967+K04967+K04967+K04967+K04967+K04967+K04967+K04967+K04967+K08834+K05692+K13804+K13805+K07972
Cluster three	Organismal Systems	Development	Dorso-ventral axis formation	50	100	2.14621e-17	1.12676e-15	ko04320	XM_006558453.3(Br-c);XM_006558456.3(Br-c);XM_006558459.3(Br-c);XM_006558460.3(Br-c);XM_006558461.3(Br-c);XM_006558462.3(Br-c);XM_006558463.3(Br-c);XM_006558470.3(Br-c);XM_006558472.3(Br-c);XM_006558473.3(Br-c);XM_016914134.2(LOC100576369);XM_026442705.1(LOC100576369);XM_006560227.3(LOC550857);XM_016916251.2(LOC550857);XM_006568761.3(LOC725626);XM_006570178.3(LOC727246);XM_006570180.3(LOC727246);X…	K02174+K02174+K02174+K02174+K02174+K02174+K02174+K02174+K02174+K02174+K03211+K03211+K04364+K04364+K03102+K02098+K02098+K02098+K02098+K02098+K02177+K02177+K02177+K02177+K02177+K02177+K02177+K02177+K02177+K02177+K02177+K02177+K02177+K02177+K02177+K02177+K02177+K02177+K02177+K02177+K02177+K02177+K02177+K02177+K02177+K02177+K02177+K03099+K03099+K03099
Cluster three	Cellular Processes	Transport and catabolism	Phagosome	49	141	8.6612e-10	3.03142e-08	ko04145	XM_006558859.3(LOC552528);XM_006558861.3(LOC552528);XM_016913760.2(LOC552528);XM_006562095.3(LOC411892);XM_006562096.3(LOC411892);XM_016912310.2(LOC411892);XM_016912311.2(LOC411892);XM_006563164.3(LOC413409);XM_006563165.3(LOC413409);XM_006563166.3(LOC413409);XM_006563167.3(LOC413409);XM_006563168.3(LOC413409);XM_006563169.3(LOC413409);XM_006563170.3(LOC413409);XM_006563171.3(LOC413409);XM_006563…	K08054+K08054+K08054+K02148+K02148+K02148+K02148+K10415+K10415+K10415+K10415+K10415+K10415+K10415+K10415+K10415+K10415+K10415+K10415+K10415+K10415+K10415+K10415+K10415+K10415+K10415+K10415+K10415+K10415+K10415+K10415+K10415+K10415+K10415+K10415+K10415+K10415+K10415+K10415+K10415+K10956+K00921+K05692+K07375+K07375+K07374+K07375+K07374+K02147
Cluster three	Environmental Information Processing	Signal transduction	Hippo signaling pathway -fly	52	178	2.10195e-07	5.51762e-06	ko04391	XM_006557237.3(LOC409286);XM_006557238.3(LOC409286);XM_006557239.3(LOC409286);XM_006557240.3(LOC409286);XM_016911128.2(LOC409286);XM_026439401.1(LOC409286);XM_006563054.3(LOC409084);XM_006563055.3(LOC409084);XM_006563057.3(LOC409084);XM_016916207.2(LOC409084);XM_016916208.2(LOC409084);XM_016916209.2(LOC409084);XM_392608.7(LOC409084);XM_006563479.3(LOC410604);XM_016916740.2(LOC410604);XM_016916741…	K04440+K04440+K04440+K04440+K04440+K04440+K05628+K05628+K05628+K05628+K05628+K05628+K05628+K04354+K04354+K04354+K04354+K04354+K04354+K04354+K04354+K04354+K16672+K16672+K16672+K16672+K16672+K16197+K16197+K16197+K16197+K16197+K16681+K16681+K16681+K05692+K02306+K16683+K12076+K12076+K12076+K12076+K12076+K12076+K12076+K12076+K12076+K12076+K12076+K12076+K12076+K12076
Cluster three	Environmental Information Processing	Signal transduction	Wnt signaling pathway	65	253	1.17458e-06	2.46662e-05	ko04310	XM_006560509.3(Camkii);XM_006560512.3(Camkii);XM_006560514.3(Camkii);XM_006560519.3(Camkii);XM_006560524.3(Camkii);XM_006560525.3(Camkii);XM_006560526.3(Camkii);XM_006560527.3(Camkii);XM_006560528.3(Camkii);XM_006560529.3(Camkii);XM_006560530.3(Camkii);XM_006560531.3(Camkii);XM_006560532.3(Camkii);XM_006560533.3(Camkii);XM_006560534.3(Camkii);XM_006560535.3(Camkii);XM_006560536.3(Camkii);XM_00656…	K04515+K04515+K04515+K04515+K04515+K04515+K04515+K04515+K04515+K04515+K04515+K04515+K04515+K04515+K04515+K04515+K04515+K04515+K04515+K04515+K04515+K04515+K04515+K04515+K04515+K04515+K04515+K04515+K04515+K04515+K04515+K04515+K04515+K04515+K04515+K04515+K04515+K04515+K04515+K04515+K04515+K04515+K04440+K04440+K04440+K04440+K04440+K04440+K02353+K02353+K03362+K03362+K03347+K04498+K04498+K04498+K04498+…
Cluster three	Genetic Information Processing	Translation	mRNA surveillance pathway	44	152	2.43865e-06	4.26765e-05	ko03015	XM_006563479.3(LOC410604);XM_016916740.2(LOC410604);XM_016916741.2(LOC410604);XM_016916742.2(LOC410604);XM_026445687.1(LOC410604);XM_026445688.1(LOC410604);XM_026445689.1(LOC410604);XM_026445690.1(LOC410604);XM_394082.7(LOC410604);XM_006563747.3(LOC551123);XM_016910663.2(LOC551123);XM_016910669.2(LOC551123);XM_016910671.2(LOC551123);XM_016910672.2(LOC551123);XM_026439265.1(LOC551123);XM_026439266…	K04354+K04354+K04354+K04354+K04354+K04354+K04354+K04354+K04354+K14411+K14411+K14411+K14411+K14411+K14411+K14411+K14411+K14411+K14411+K14411+K14411+K14411+K14411+K14411+K14411+K14411+K14411+K14411+K14411+K14411+K14411+K14411+K14411+K14411+K08873+K08873+K08873+K12875+K14376+K14376+K06965+K06965+K14411+K14408
Cluster three	Environmental Information Processing	Signaling molecules and interaction	ECM-receptor interaction	18	47	4.80692e-05	0.000721039	ko04512	XM_006566903.3(LOC408393);XM_006566907.3(LOC408393);XM_006566908.3(LOC408393);XM_006566909.3(LOC408393);XM_006566910.3(LOC408393);XM_006566911.3(LOC408393);XM_006566912.3(LOC408393);XM_026444279.1(LOC408393);XM_026444280.1(LOC408393);XM_026444281.1(LOC408393);XM_026444282.1(LOC408393);XM_006568105.3(LOC409924);XM_016912131.2(LOC409924);XM_016912133.2(LOC409924);XM_016912134.2(LOC409924);XM_016913…	K06254+K06254+K06254+K06254+K06254+K06254+K06254+K06254+K06254+K06254+K06254+K06258+K06258+K06258+K06258+K06258+K06258+K05635
Cluster three	Metabolism	Carbohydrate metabolism	Starch and sucrose metabolism	14	38	0.000530513	0.00696299	ko00500	NM_001112671.1(LOC410795);XM_026446360.1(LOC410795);XM_006557582.3(LOC551005);XM_006557583.3(LOC551005);XM_006557584.3(LOC551005);XM_006557585.3(LOC551005);XM_006560197.3(LOC410484);XM_393963.6(LOC410484);XM_016911661.2(LOC408818);XM_026441493.1(LOC408867);XM_026441495.1(LOC408867);XM_026441496.1(LOC408867);XM_026441497.1(LOC408867);XM_026441498.1(LOC408867)	K01194+K01194+K00844+K00844+K00844+K00844+K01194+K01194+K00844+K16055+K16055+K16055+K16055+K16055
Cluster three	Cellular Processes	Cell growth and death	Apoptosis - fly	32	130	0.00140708	0.0164159	ko04214	XM_006563323.3(Mblk-1);XM_016916453.2(Mblk-1);XM_016916455.2(Mblk-1);NM_001011634.2(Usp);XM_006561546.3(Usp);XM_006561547.3(Usp);XM_006561548.3(Usp);XM_006561549.3(Usp);XM_006561550.3(Usp);XM_006558453.3(Br-c);XM_006558456.3(Br-c);XM_006558459.3(Br-c);XM_006558460.3(Br-c);XM_006558461.3(Br-c);XM_006558462.3(Br-c);XM_006558463.3(Br-c);XM_006558470.3(Br-c);XM_006558472.3(Br-c);XM_006558473.3(Br-c);…	K20015+K20015+K20015+K14030+K14030+K14030+K14030+K14030+K14030+K02174+K02174+K02174+K02174+K02174+K02174+K02174+K02174+K02174+K02174+K04440+K04440+K04440+K04440+K04440+K04440+K04431+K06030+K06030+K09031+K09031+K09031+K01527
Cluster three	Environmental Information Processing	Signal transduction	TGF-beta signaling pathway	25	98	0.00270713	0.0279424	ko04350	XM_006564347.3(LOC412866);XM_396318.7(LOC412866);XM_394044.7(LOC410565);XM_006568834.3(LOC726280);XM_026439074.1(LOC726280);XM_026439075.1(LOC726280);XM_026439076.1(LOC726280);XM_026439077.1(LOC726280);XM_026439078.1(LOC726280);XM_006570026.3(LOC410035);XM_006570028.3(LOC410035);XM_006570029.3(LOC410035);XM_006570030.3(LOC410035);XM_006570031.3(LOC410035);XM_016912321.2(LOC410035);XM_026442353.1(…	K04678+K04678+K03347+K04498+K04498+K04498+K04498+K04498+K04498+K04657+K04657+K04657+K04657+K04657+K04657+K04657+K04657+K04500+K03868+K03868+K04688+K04688+K04688+K03094+K16621
Cluster three	Metabolism	Metabolism of other amino acids	Phosphonate and phosphinate metabolism	7	15	0.0029273	0.0279424	ko00440	XM_016916628.2(LOC552795);XM_016916629.2(LOC552795);XM_016916630.2(LOC552795);XM_016916631.2(LOC552795);XM_016916632.2(LOC552795);XM_016916633.2(LOC552795);XM_016916634.2(LOC552795)	K13644+K13644+K13644+K13644+K13644+K13644+K13644
